# Supplementary material
Source: PubMed Central journal article supplement (PMC2858690)
Supplement: NIHMS138783-supplement-Supp_Figure_1.pdf [file NIHMS138783-supplement-Supp_Figure_1.pdf]

**Supplementary Fig. 1 Full sequence of reporter plasmid pKJ1712 (8723 bp)**

GCGGTCCGGATGAGCATTTCATCAGGCGGGCAAGAATGTGAATAAAGGCCGG  
ATAAACTTGTGCTTATTTTTCTTTACGGTCTTTAAAAAGGCCGTAATATCCA  
GCTGAACGGTCTGGTTATAGGTACATTGAGCAACTGACTGAAATGCCTCAA  
ATGTTCTTTACGATGCCATTGGGATATATCAACGGTGGTATATCCAGTGATTT  
TTTTCTCCATTTTAGCTTCCTTAGCTCCTGAAAATCTCGATAACTCAAAAAAT  
ACGCCCCGGTAGTGATCTTATTTTCATTATGGTGAAAGTTGGAACCTCTTACGTG  
CCGATCAACGTCTCATTTTTCGCCAAAAGTTGGCCCAGGGCTTCCCAGTATCAA  
CAGGGACACCAGGATTTATTTATTCTGCGAAGTGATCTTCCGTCACAGGTATT  
TATTCGGCGCAAAGTGCGTCGGGTGATGCTGCCAACTTACTGATTTAGTGTAT  
GATGGTGTTTTTGAGGTGCTCCAGTGGCTTCTGTTTCTATCAGCTGTCCCTCCT  
GTTCAGCTACTGACGGGGTGGTGCCTAACGGCAAAAGCACCAGCCGGACATCA  
GCGCTAGCGGAGTGTATACTGGCTTACTATGTTGGCACTGATGAGGGTGTCA  
GTGAAGTGCTTCATGTGGCAGGAGAAAAAGGCTGCACCCGGTGCCTCAGCAG  
AATATGTGATACAGGATATATTTCCGCTTTCCTCGCTCACTGACTCGCTACGCTC  
GGTCGTTGACTGCGGCGAGCGGAAATGGCTTACGAACGGGGCGGAGATTTTC  
CTGGAAGATGCCAGGAAGATACTTAACAGGGAAAGTGAGAGGGCCGCGGCAA  
AGCCGTTTTTCCATAGGCTCCGCCCCCTGACAAGCATCACGAAATCTGACGC  
TCAAATCAGTGGTGGCGAAACCCGACAGGACTATAAAGATAACCAGGCGTTTC  
CCCTGGCGGCTCCCTCGTGCCTCTCCTGTTCTGCTTTCGGTTTACCGGTGT  
CATTCCGCTGTTATGGCCGCGTTTGTCTCATTCCACGCCTGACACTCAGTTCC  
GGGTAGGCAGTTCGCTCCAAGCTGGACTGTATGCACGAACCCCCCGTTCAGT  
CCGACCGCTGCGCCTTATCCGGTAACTATCGTCTTGAGTCCAACCCGGAAAG  
ACATGCAAAGCACCCTGGCAGCAGCCACTGGTAATTGATTTAGAGGAGTT  
AGTCTTGAAGTCATGCGCCGGTTAAGGCTAAACTGAAAGGACAAGTTTTGGT  
GACTGCGCTCCTCCAAGCCAGTTACCTCGGTTCAAAGAGTTGGTAGCTCAGA  
GAACCTTCGAAAAACCGCCCTGCAAGGCGGTTTTTTTCGTTTTTCAGAGCAAGA  
GATTACGCGCAGACCAAACGATCTCAAGAAGATCATCTTATTAATCAGATA  
AAATATTTCTAGATTTTCAGTGCAATTTATCTCTTCAAATGTAGCACCTGAAGT  
CAGCCCCATACGATATAAGTTGTAATTTCTCATGTTTGACAGCTTATCATCGAT  
AAGCTAGCTTTAATGCGGTAGTTTATCACAGTTAAATTGCTAACGCAGTCAGG  
CACCGTGTATGAAATCTAACAATGCGCTCATCGTCATCCTCGGCACCGTCACC  
CTGGATGCTGTAGGCATAGGCTTGGTTATGCCGGTTGCACAATCTTCTCGCGC  
AACGCGTCAGTGGGCTGATCATTAATCTCCGCTGGATGACCAGGATGCCAT  
TGCTGTGGAAGCTGCCTGCACTAATGTTCCGGCGTTATTTCTTGATGTCTCTG  
ACCAGACACCCATCAACAGTATTATTTTCTCCCATGAAGACGGTACGCGACT  
GGGCGTGGAGCATCTGGTCGCATTGGGTACCAGCAAATCGCGCTGTTAGCG  
GGCCATTAAGTTCTGTCTCGGCGCGTCTGCGTCTGGCTGGCTGGCATAAATA  
TCTCACTCGCAATCAAATTCAGCCGATAGCGGAACGGGAAGGCGACTGGAGT  
GCCATGTCCGGTTTTCAACAAACCATGCAAATGCTGAATGAGGGCATCGTTC  
CCACTGCGATGCTGGTTGCCAACGATCAGATGGCGCTGGGCGCAATGCGCGC  
CATTACCGAGTCCGGGCTGCGCGTTGGTGCAGATATCTCGGTAGTGGGATAC  
GACGATAACGAAGACAGCTCATGTTATATCCCAGCGTTAACCACCATCAAAC  
AGGATTTTCGCCTGCTGGGGCAAACAGCGTGGACCGCTTGCTGCAACTCTCT  
CAGGGCCAGGCGGTGAAGGGCAATCAGCTGTTGCCCGTCTCACTGGTGAAAA

GAAAAACCACCCTGGCGCCCAATACGCAAACCGCCTCTCCCCGCGCGTTGGC  
CGATTCATTAATGCAGCTGGCAGCAGGTTTCCCGACTGGAAAGCGGGCAG  
TGAGCGCAACGCAATTAATGTAAGTTAGCGCGAATTATCGTCCATTCCGACA  
GCATCGCCAGTCACTATGGCGTGCTGCTAGCGCTATATGCGTTGATGCAATTT  
CTATGCGCACCCGTTCTCGGAGCACTGTCCGACCGCTTTGGCCGCCGCCAGT  
CCTGCTCGCTTCGCTACTTGGAGCCACTATCGACTACGCGATCATGGCGACCA  
CACCCGTCCTGTGGGATCAGATCTCGCAATTGCCGTTGATTTGGGGATCTTTG  
TTGTAGGTGGACCAGTTGGTGATTTTGAAC TTTTGCTTTGCCACGGAACGGTC  
TGCGTTGTCGGGAAGATGCGTGATCTGATCCTTCAACTCAGCAAAGTTTCGAT  
TTATTCAACAAAGCCGCGTCCCGTCAAGTCAGCGTAATGCTCTGCCAGTGTT  
ACAACCAATTAACCAATTCTGATTAGAAAACTCATCGAGCATCAAATGAAA  
CTGCAATTTATTCATATCAGGATTATCAATACCATATTTTTGAAAAAGCCGTT  
TCTGTAATGAAGGAGAAAAC TCAACCGAGGCAGTTCATAGGATGGCAAGATC  
CTGGTATCGGTCTGCGATTCCGACTCGTCCAACATCAATAACAACCTATTAATT  
TCCCCTCGTCAAAAATAAGGTTATCAAGTGAGAAATCACCATGAGTGACGAC  
TGAATCCGGTGAGAATGGCAAGAGCTTATGCATTTCTTTCCAGACTTGTTCAA  
CAGGCCAGCCATTACGCTCGTCATCAAAATCACTCGCATCAACCAAACCGTT  
ATTCATTCGTGATTGCGCCTGAGCGAGACGAAATACGCGATCGCTGTTAAAA  
GGACAATTACAAACAGGAATCGAATGCAACCGGCGCAGGAACACTGCCAGC  
GCATCAACAATATTTTACCTGAATCAGGATATTCTTCTAATACCTGGAATGC  
TGTTTTCCCGGGGATCGCAGTGGTGAGTAACCATGCATCATCAGGAGTACGG  
ATAAAATGCTTGATGGTCGGAAGAGGCATAAATCCGTCAGCCAGTTTAGTC  
TGACCATCTCATCTGTAACATCATTGGCAACGCTACCTTTGCCATGTTTCAGA  
AACAACTCTGGCGCATCGGGCTTCCCATACAATCGATAGATTGTGCGACCTG  
ATTGCCCGACATTATCGCGAGCCATTTATACCCATATAAATCAGCATCCATG  
TTGGAATTTAATCGCGGCCTCGAGCAAGACGTTTCCCGTTGAATATGGCTCAT  
AACACCCCTTGTAATTACTGTTTATGTAAGCAGACAGTTTTTATTGTTTCATGATG  
ATATATTTTTATCTTGTGCAATGTAACATCAGAGATTTTGAGACACAACGTGG  
CTTTGTTGAATAAATCGAACTTTTGCTGAGTTGAAGGATCAGATCACGCATCT  
TCCCGACAACGCAGACCGTTCCGTGGCAAAGCAAAGTTCAAATCACCAAC  
TGGTCCCACCTGACCCCATGCCGA ACTCAGAAGTGAAACGCCGTAGCGCCGA  
TGGTAGTGTGGGGTCTCCCCATGCGAGAGTAGGGA ACTGCCAGGCATCAAAT  
AAAACGAAAGGCTCAGTCGAAAGACTGGGCCTTTCGTTTTATCTGTTGTTTGT  
CGGTGAACGCTCTCCTGAGTAGGACAAATCCGCCGGGAGCGGATTTGAACGT  
TGCGAAGCAACGGCCCCGAGGGTGGCGGGCAGGACGCCCGCCATAAACTGC  
CAGGCATCAAATTAAGCAGAAGGCCATCCTGACGGATGGCCTTTTTGCGTTTC  
TACAAACTCTTTTGTTTATTTTTCTAAATACATTCAAATATGTATCCGCTCATG  
ACATTAACCTATAAAAATAGGCGTATCACGAGGCCCTTTCGTCTTCAAGAATT  
CTGTGGAAGATCTTGAAGAGCGCGGCCGCGATGACCGTAGGCGCGCCGCTCT  
TCTATTACATTAGGCACCCCGGGCTTTACTTTTATGCTTCCGGCTCGTATGTT  
GTGTCGACCGAGCGGATAACAATTTACACAGGAAACAGCTATGACAGAGCA  
GAAAGCCCTAGTAAAGCGTATTACAAATGAAACCAAGATTCAGATTGCGATC  
TCTTTAAAGGGTGGTCCCCTAGCGATAGAGCACTCGATCTTCCCAGAAAAAG  
AGGCAGAAGCAGTAGCAGAACAGGCCACACAATCGCAAGTGATTAACGTCC  
ACACAGGTATAGGGTTTCTGGACCATATGATACATGCTCTGGCCAAGCATTC  
GGCTGGTCGCTAATCGTTGAGTGCAATTGGTGACTTACACATAGACGACCATC

ACACCACTGAAGACTGCGGGATTGCTCTCGGTCAAGCTTTTAAAGAGGCCCT  
AGGGGCCGTGCGTGGAGTAAAAAGGTTTGGATCAGGATTTGCGCCTTTGGAT  
GAGGCACTTCCAGAGCGGTGGTAGATCTTTCGAACAGGCCGTACGCAGTTG  
TCGAACTTGGTTTGCAAAGGGAGAAAGTAGGAGATCTCTCTTGGCAGATGAT  
CCCGCATTTTCTTGAAGCTTTGCAGAGGCTAGCAGAATTACCCTCCACGTTG  
ATTGTCTGCGAGGCAAGAATGATCATCACCGTAGTGAGAGTGCGTTCAAGGC  
TCTTGGCGTTGCCATAAGAGAAGCCACCTCGCCCAATGGTACCAACGATGTT  
CCCTCCACCAAAGGTGTTCTTATGTAGTGACACCGATTATTTAAAGCTGCAGG  
GATCCACACAGGAAACAGCTATGAGGGAAGCGGTGATCGCCGAAGTATCG  
ACTCAACTATCAGAGGTAGTTGGCGTCATCGAGCGCCATCTCGAACCGACGT  
TGCTGGCCGTACATTTGTACGGCTCCGCAGTGGATGGCGGCCTGAAGCCACA  
CAGTGATATTGATTTGCTGGTTACGGTGACCGTAAGGCTTGATGAAACAACG  
CGGCGAGCTTTGATCAACGACCTTTTGGAACTTCGGCTTCCCCTGGAGAGA  
GCGAGATTCTCCGCGCTGTAGAAGTCACCATTGTTGTGCACGACGACATCATT  
CCGTGGCGTTATCCAGCTAAGCGCGAACTGCAATTTGGAGAATGGCAGCGCA  
ATGACATTCTTGCAGGTATCTTCGAGCCAGCCACGATCGACATTGATCTGGCT  
ATCTTGCTGACAAAAGCAAGAGAACATAGCGTTGCCTTGGTAGGTCCAGCGG  
CGGAGGAACTCTTTGATCCGGTTCCTGAACAGGATCTATTTGAGGCGCTAAAT  
GAAACCTTAACGCTATGGAACCTCGCCGCCGACTGGGCTGGCGATGAGCGAA  
ATGTAGTGCTTACGTTGTCCCGCATTTGGTACAGCGCAGTAACCGGCAAATC  
GCGCCGAAGGATGTCGCTGCCGACTGGGCAATGGAGCGCCTGCCGGCCAGT  
ATCAGCCCCTCATACTTGAAGCTAGACAGGCTTATCTTGGACAAGAAGAAGA  
TCGCTTGGCCTCGCGCGCAGATCAGTTGGAAGAATTTGTCCACTACGTGAAA  
GGCGAGATACCAAGGTAGTCGGCAAATAAGCTTGGCACTGGCCGTCGTTTT  
ACAACGTCGTGACTGGGAAAACCCTGGCGTTACCCAACCTTAATCGCCTTGCA  
GCACATCCCCCTTTCGCCAGCTGGCGTAATAGCGAAGAGGCCCGCACCGATC  
GCCCTTCCCAACAGTTGCGCAGCCTGAATGGCGAATGGCGCTTTGCCTGGTTT  
CCGGCACCAAGAAGCGGTGCCGGAAGCTGGCTGGAGTGCGATCTTCTGAGGC  
CGATACTGTGTCGTCGTCCTCAAACCTGGCAGATGCACGGTTACGATGCGCCC  
ATCTACACCAACGTAACCTATCCCATTACGGTCAATCCGCCGTTTGTTCAC  
GGAGAATCCGACGGGTTGTTACTCGCTCACATTTAATGTTGATGAAAGCTGG  
CTACAGGAAGGCCAGACGCGAATTATTTTTGATGGCGTTAACTCGGCGTTTCA  
TCTGTGGTGCAACGGGCGCTGGGTTCGGTTACGGCCAGGACAGTCGTTTGGCG  
TCTGAATTTGACCTGAGCGCATTTTTACGCGCCGGAGAAAACCGCCTCGCGGT  
GATGGTGCTGCGTTGGAGTGACGGCAGTTATCTGGAAGATCAGGATATGTGG  
CGGATGAGCGGCATTTTCCGTGACGAATTTCTGCCATTCATCCGCTTATTATC  
ACTTATTCAGGCGTAGCACAGGCGTTTTAAGGGCACCAATAACTGCCTTAAA  
AAAATTACGCCCCGCCCTGCCACTCATCGCAGTACTGTTGTAATTCATTAAGC  
ATTCTGCCGACATGGAAGCCATCACAGACGGCATGATGAACCTGAATCGCCA  
GCGGCATCAGCACCTTGTGCGCCTTGGTATAATATTTGCCCATGGCCGGATCG  
GCATTTTCTTTTTCGTTTTTATTTGTTAACTGTTAATTGTCCTTGTTCAGGAT  
GCTGTCTTTGACAACAGATGTTTTCTTGCCTTTGATGTTTACGAGGAAGCTTG  
GCGCAAACGTTGATTGTTTGTCTGCGTAGAATCCTCTGTTTGTATATAGCTT  
GTAATCACGACATTGTTTCTTTCGCTTGAGGTACAGCGAAGTGTGAGTAAGT  
AAAGGTTACATCGTTAGGATCAAGATCCATTTTTAACACAAGGCCAGTTTTGT  
TCAGCGGCTTGTATGGGCCAGTTAAAGAATTAGAAACATAACCAAGCATGTA

AATATCGTTAGACGTAATGCCGTCAATCGTCATTTTTGATCCGCGGGAGTCAG  
TGAACAGGTACCATTTGCCGTTCAATTTAAAGACGTTTCGCGCGTTCAATTTCA  
TCTGTTACTGTGTTAGATGCAATCAGCGGTTTCATCACTTTTTTCAGTGTGTAA  
TCATCGTTTAGCTCAATCATACCGAGAGCGCCGTTTGCTAACTCAGCCGTGCG  
TTTTTATCGCTTTCGAGAAGTTTTTGACTTTCTTGACGGAAGAATGATGTGCT  
TTTGCCATAGTATGCTTTGTTAAATAAAGATTCTTCGCCTTGGTAGCCATCTTC  
AGTTCCAGTGTGTTGCTTCAAATACTAAGTATTTGTGGCCTTTATCTTCTACGTA  
GTGAGGATCTCTCAGCGTATGGTTGTCGCCTGAGCTGTAGTTGCCTTCATCGA  
TGAAGTGTGTACATTTTGATACGTTTTTCCGTCACCGTCAAAGATTGATTTAT  
AATCCTCTACACCGTTGATGTTCAAAGAGCTGTCTGATGCTGATACGTTAACT  
TGTGCAGTTGTCAGTGTGTTGTTGCCGTAATGTTTACCGGAGAAATCAGTGTA  
GAATAAACGGATTTTTCCGTCAGATGTAAATGTGGCTGAACCTGACCATTCTT  
GTGTTTGGTCTTTTAGGATAGAATCATTTGCATCGAATTTGTGCGCTGTCTTTAA  
AGACGCGGCCAGCGTTTTTCCAGCTGTCAATAGAAGTTTCGCCGACTTTTTGA  
TAGAACATGTAAATCGATGTGTCATCCGCATTTTTAGGATCTCCGGCTAATGC  
AAAGACGATGTGGTAGCCGTGATAGTTTGCACAGTGCCGTCAGCGTTTTGT  
AATGGCCAGCTGTCCCAAACGTCCAGGCCTTTTGCAGAAGAGATATTTTTAAT  
TGTGGACGAATCGAACTCAGGAAGTTGATATTTTTTCATTTTTTTGCTGTTTCAG  
GGATTTGCAGCATATCATGGCGTGTAAATATGGGAAATGCCGTATGTTTCCTTA  
TATGGCTTTTGGTTCGTTTCTTTTCGCAAACGCTTGAGTTGCGCCTCCTGCCAGC  
AGTGCGGTAGTAAAGGTTAATACTGTTGCTTGTGTTTGCAAACTTTTTGATGTT  
CATCGTTCATGTCTCCTTTTTTATGTACTGTGTTAGCGGTCTGCTTCTTCCAGC  
CCTCCTGTTTGAAGATGGCAAGTTAGTTACGCACAATAAAAAAAGACCTAAA  
ATATGTAAGGGGTGACGCCAAAGTATACACTTTGCCCTTTACACATTTTAGGT  
CTTGCCCTGCTTATCAGTAACAAACCCGCGGATTTACTTTTTCGACCTCATTCT  
ATTAGACTCTCGTTTGGATTGCAACTGGTCTATTTTCCTCTTTTGTGTTGATAGA  
AAATCATAAAAGGATTTGCAGACTACGGGCCTAAAGAACTAAAAAATCTATC  
TGTTTCTTTTCATTCTCTGTATTTTTTATAGTTTCTGTTGCATGGGCATAAAGTT  
GCCTTTTTAATCACAATTCAGAAAATATCATAATATCTCATTTCACTAAATAA  
TAGTGAACGGCAGGTATATGTGATGGGTAAAAAGGATCTGATGA

Plasmid features:

|               |                                                   |
|---------------|---------------------------------------------------|
| nts 581-1492  | p15A origin of replication                        |
| nts 1664-2415 | C-terminal lacI gene fragment (for recombination) |
| nts 2862-3673 | Kanamycin-resistance gene                         |
| nts 3987-4030 | rrnB T1 terminator                                |
| nts 4162-4189 | rrnB T2 terminator                                |
| nts 4319-4325 | SapI site #1                                      |
| nts 4352-4358 | SapI site #2                                      |
| nts 4381-4386 | lac promoter -35 box                              |
| nts 4405-4410 | lac promoter -10 box                              |
| nt 4417       | lac promoter transcription start point            |
| nts 4452-4454 | HIS3 gene start codon                             |
| nts 5112-5114 | HIS3 gene stop codon                              |
| nts 5162-5164 | aadA gene start codon                             |

nts 5951-5953  
nts 5960-6576  
nts 6833-6835  
nts 6833-8254  
nts 8252-8254

aadA gene stop codon  
lacZ gene fragment (for recombination)  
sacB stop codon (rev comp strand)  
sacB coding sequence (rev comp strand)  
sacB start codon (rev comp strand)
