# Supplementary material
Source: PubMed Central journal article supplement (PMC2858690)
Supplement: NIHMS138783-supplement-Supp_Figure_2.pdf [file NIHMS138783-supplement-Supp_Figure_2.pdf]

**Supplementary Fig. 2 Full sequence of the B2H vector pBR-UV5-GP-FD2 (3508 bp)**

GAATTCGGGCTTTACACTTTATGCTTCCGGCTCGTATAATGTGTGCGACTTGT  
GAGCGGATAACAATTTACACAGGAAACAGCTATGCCTCAACAGCAGCAAAT  
GCAACCTCCCAATTC AAGTGC GGACAACAACCCTTTGCAACAGCAATCATCA  
CAAATACCGTACCAAACGTCCTCAACCAAATTAACCAAATCTTTTCTCCAG  
AGGAGCAACGCAGCTTATTACAAGAAGCCATCGAAACCTGCAAGAATTTTGA  
AAAAACACAATTGGGTAGTACGATGACGGAACCTGTCAAGCAAAGTTTTATT  
AGGAAATACATTGTGCAAAAGGCCCTGAGAAAAATCCAAGCTTTGGCGGCCG  
CTGACTACAAAGACGATGATGACAAATCTAGACCCGGGGAGGTCTTCTAAGT  
GAGGATCCTAAGTAAGAAGACATGCACAGTAGTAAGTAGAGACTAGAAAA  
GGCCGACAAGTCCCGCTCCGCTGAAGATCCTGGCGTAATAGCGAAGAGGCC  
GCACCGATCGCCCTTCCCAACAGTTGCGCAGCCTGAATGGCGAATGGGACGC  
GCCCTGTAGCGGCGCATTAAGCGCGGGGTGTGGTGGTTACGCGCAGCGTG  
ACCGCTACACTTGCCAGCGCCCTAGCGCCCGCTCCTTTTCGCTTTCTTCCCTTCC  
TTTCTCGCCACGTTTCGCCGGCTTTCCCGTCAAGCTCTAAATCGGGGGCTCCC  
TTTAGGGTTCCGATTTAGTGCTTTACGGCACCTCGACCCCAAAAACTTGATT  
AGGGTGATGGTTCACGTAGTGGGCCATCGCCCTGATAGACGGTTTTTTCGCCCT  
TTGACGTTGGAGTCCACGTTCTTTAATAGTGGACTCTTGTTCAAACTGGAAC  
AACACTCAACCCTATCTCGGTCTATTCTTTTGATTTATAAGGGATTTTGCCGAT  
TTCGGCCTATTGGTTAAAAAATGAGCTGATTTAACAAAAATTTAACGCGAATT  
TTAACAAAAATATTAACGCTTACAATTTAGGTGGCACTTTTTCGGGGAAATGTGC  
GCGGAACCCCTATTTGTTTATTTTTCTAAATACATTCAAATATGTATCCGCTCA  
TGAGACAATAACCCTGATAAATGCTTCAATAATATTGAAAAAGGAAGAGTAT  
GAGTATTCAACATTTCCGTGTCGCCCTTATTCCCTTTTTTTCGGGCATTTTGCCT  
TCCTGTTTTTGTACACCAGAAACGCTGGTGAAAGTAAAAGATGCTGAAGAT  
CAGTTGGGTGCACGAGTGGGTACATCGAACTGGATCTCAACAGCGGTAAGA  
TCCTTGAGAGTTTTTCGCCCGAAGAACGTTTTTCCAATGATGAGCACTTTTAAA  
GTTCTGCTATGTGGCGCGGTATTATCCCGTATTGACGCCGGGCAAGAGCAACT  
CGGTCGCCGCATACACTATTCTCAGAATGACTTGGTTGAGTACTCACCAGTCA  
CAGAAAAGCATCTTACGGATGGCATGACAGTAAGAGAATTATGCAGTGCTGC  
CATAACCATGAGTGATAACACTGCGGCCAACTTACTTCTGACAACGATCGGA  
GGACCGAAGGAGCTAACCGCTTTTTTGCACAACATGGGGGATCATGTAACTC  
GCCTTGATCGTTGGGAACCGGAGCTGAATGAAGCCATACCAAACGACGAGCG  
TGACACCACGATGCCTGTAGCAATGGCAACAACGTTGCGCAAACCTATTAAC  
GGCGAACTACTTACTCTAGCTTCCCGGCAACAATTAATAGACTGGATGGAGG  
CGGATAAAGTTGCAGGACCACTTCTGCGCTCGGCCCTTCCGGCTGGCTGGTTT  
ATTGCTGATAAATCTGGAGCCGGTGAGCGTGGGTCTCGCGGTATCATTGCAG  
CACTGGGGCCAGATGGTAAGCCCTCCCGTATCGTAGTTATCTACACGACGGG  
GAGTCAGGCAACTATGGATGAACGAAATAGACAGATCGCTGAGATAGGTGC  
CTCACTGATTAAGCATTGGTAACCTGTCAGACCAAGTTTACTCATATATACTTT  
AGATTGATTTAAAACCTTCATTTTTAATTTAAAAGGATCTAGGTGAAGATCCTT  
TTTGATAATCTCATGACCAAAATCCCTTAACGTGAGTTTTTCGTTCCACTGAGC  
GTCAGACCCCGTAGAAAAGATCAAAGGATCTTCTTGAGATCCTTTTTTTCTGC  
GCGTAATCTGCTGCTTGCAAACAAAAAAACCACCGCTACCAGCGGTGGTTTG

TTTGCCGGATCAAGAGCTACCAACTCTTTTTCCGAAGGTAAGTGGCTTCAGCA  
 GAGCGCAGATACCAAATACTGTCCTTCTAGTGTAGCCGTAGTTAGGCCACCA  
 CTCAAGAACTCTGTAGCACCGCCTACATACCTCGCTCTGCTAATCCTGTTAC  
 CAGTGGCTGCTGCCAGTGGCGATAAGTCGTGTCTTACCGGGTTGGACTCAAG  
 ACGATAGTTACCGGATAAGGCGCAGCGGTTCGGGCTGAACGGGGGGTTCGTGC  
 ACACAGCCCAGCTTGGAGCGAACGACCTACACCGAACTGAGATACCTACAGC  
 GTGAGCTATGAGAAAGCGCCACGCTTCCCGAAGGGAGAAAGGCGGACAGGT  
 ATCCGGTAAGCGGCAGGGTTCGGAACAGGAGAGCGCACGAGGGAGCTTCCAG  
 GGGGAAACGCCTGGTATCTTTATAGTCCTGTTCGGGTTTCGCCACCTCTGACTT  
 GAGCGTCGATTTTTGTGATGCTCGTCAGGGGGGCGGAGCCTATGGAAAACG  
 CCAGCAACGCGGCCTTTTTACGGTTCCTGGCCTTTTGCTGGCCTTTTGCTCACA  
 TGTTCTTTCCTGCGTTATCCCCTGATTCTGTGGATAACCGTATTACCGCCTTTG  
 AGTGAGCTGATACCGCTCGCCGCAGCCGAACGACCGAGCGCAGCGAGTCAGT  
 GAGCGAGGAAGCGGAAGAGCGCCTGATGCGGTATTTTCTCCTTACGCATCTG  
 TCGGGTATTTACACCCGCATATGGTGCCTCTCAGTACAATCTGCTCTGATGC  
 CGCATAGTTAAGCCAGTATACTCCGCTATCGCTACGTGACTGGGTTCATGGC  
 TCGCCCCGACACCCGCCAACACCCGCTGACGCGCCCTGACGGGCTTGTCTG  
 CTTCCGGCATCCGCTTACAGACAAGCTGTGACCGTCTCCGGGAGCTGCATGT  
 GTCAGAGGTTTTACCGTCATCACCGAAACGCGCGAGGCAGCTGCGGTAAAG  
 CTCATCAGCGTGGTCGTGAAGCGATTCACAGATGTCTGCCTGTTTCATCCGCGT  
 CCAGCTCGTTGAGTTTCTCCAGAAGCGTTAATGTCTGGCTTCTGATAAAGCGG  
 GCCATGTTAAGGGCGGTTTTTTTCCTGTTTGGTCACTGATGCCTCCGTGTAAGG  
 GGGATTTCTGTTTCATGGGGGTAATGATACCGATGAAACGAGAGAGGATGCTC  
 ACGATACGGGTTACTGATGATGAACATGCCCGGTTACTGGAACGG

Plasmid features:

|               |                                                                                            |
|---------------|--------------------------------------------------------------------------------------------|
| nts 12-17     | lacUV5 promoter -35 box                                                                    |
| nts 36-41     | lacUV5 promoter -10 box                                                                    |
| nt 48         | lacUV5 promoter transcription start point                                                  |
| nts 86-88     | Start codon for Gal11P protein fragment                                                    |
| nts 89-358    | Coding sequence for Gal11P a.a. 263-352 (with additional translationally silent mutations) |
| nts 407-412   | BbsI site #1                                                                               |
| nts 433-438   | BbsI site #2                                                                               |
| nts 568-1024  | f1 phage origin of replication                                                             |
| nts 1156-2013 | beta-lactamase gene cassette (confers resistance to ampicillin and carbenicillin)          |
| nts 2016-2956 | ColE1 origin of replication (plasmid origin)                                               |
| nts 3203-3390 | rop gene (associated with regulation of copy number)                                       |
