# Supplementary material
Source: PubMed Central journal article supplement (PMC2858690)
Supplement: NIHMS138783-supplement-Supp_Figure_3.pdf [file NIHMS138783-supplement-Supp_Figure_3.pdf]

**Supplementary Fig. 3 Full sequence of the pAC-alphaGal4 vector (3428 bp)**

GAATTCGGATGAGCATTTCATCAGGCGGGCAAGAATGTGAATAAAGGCCGG  
ATAAACTTGTGCTTATTTTTCTTTACGGTCTTTAAAAAGGCCGTAATATCCA  
GCTGAACGGTCTGGTTATAGGTACATTGAGCAACTGACTGAAATGCCTCAA  
ATGTTCTTTACGATGCCATTGGGATATATCAACGGTGGTATATCCAGTGATTT  
TTTTCTCCATTTTAGCTTCCTTAGCTCCTGAAAATCTCGATAACTCAAAAAAT  
ACGCCCCGGTAGTGATCTTATTTTCATTATGGTGAAAGTTGGAACCTCTTACGTG  
CCGATCAACGTCTCATTTTTCGCCAAAAGTTGGCCCAGGGCTTCCCAGTATCAA  
CAGGGACACCAGGATTTATTTATTCTGCGAAGTGATCTTCCGTCACAGGTATT  
TATTCGGCGCAAAGTGCGTCGGGTGATGCTGCCAACTTACTGATTTAGTGTAT  
GATGGTGTTTTTGAGGTGCTCCAGTGGCTTCTGTTTCTATCAGCTGTCCTCCT  
GTTCAGCTACTGACGGGGTGGTGCCTAACGGCAAAGCACCAGCCGGACATCA  
GCGCTAGCGGAGTGTATACTGGCTTACTATGTTGGCACTGATGAGGGTGTCA  
GTGAAGTGCTTCATGTGGCAGGAGAAAAAGGCTGCACCGGTGCGTCAGCAG  
AATATGTGATACAGGATATATTCCGCTTCTCCTCGCTCACTGACTCGCTACGCTC  
GGTCGTTGACTGCGGCGAGCGGAAATGGCTTACGAACGGGGCGGAGATTTTC  
CTGGAAGATGCCAGGAAGATACTTAACAGGGAAAGTGAGAGGGCCGCGGCAA  
AGCCGTTTTTCCATAGGCTCCGCCCCCTGACAAGCATCACGAAATCTGACGC  
TCAAATCAGTGGTGGCGAAACCCGACAGGACTATAAAGATAACCAGGCGTTTC  
CCCCTGGCGGCTCCCTCGTGCCTCTCCTGTTCTGCTTTTCGGTTTACCGGTG  
TCATTCGCTGTTATGGCCGCGTTTGTCTCATTCCACGCCTGACACTCAGTTCC  
GGTAGGCAGTTCGCTCCAAGCTGGACTGTATGCACGAACCCCCCGTTCACT  
CCGACCGCTGCGCCTTATCCGGTAACTATCGTCTTGAGTCCAACCCGGAAAG  
ACATGCAAAGCACCCTGGCAGCAGCCACTGGTAATTGATTTAGAGGAGTT  
AGTCTTGAAGTCATGCGCCGGTTAAGGCTAAACTGAAAGGACAAGTTTTGGT  
GACTGCGCTCCTCCAAGCCAGTTACCTCGGTTCAAAGAGTTGGTAGCTCAGA  
GAACCTTCGAAAAACCGCCCTGCAAGGCGGTTTTTTTCGTTTTTCAGAGCAAGA  
GATTACGCGCAGACCAAACGATCTCAAGAAGATCATCTTATTAATCAGATA  
AAATATTTCTAGATTTTCAGTGCAATTTATCTCTTCAAATGTAGCACCTGAAGT  
CAGCCCCATACGATATAAGTTGTAATTTCTCATGTTTGACAGCTTATCATCGAT  
AAGCTTGCATGCATCCATCAAAAAAATATTGACAACATAAAAAACTTTGTGT  
TATACTTGTAACGCTACATGGAGATTAACTCAATCTAGCTAGAGAGGCTTTAC  
ACTTTATGCTTCCGGCTCGTATAATGTGTGGAATTGTGAGCGGATAACAATTT  
CACACAGGAAACAGCTATGACCATGATTACGGATTCAGTGAACCTCTAGACC  
AAAGAGAGGACACAATGCAGGGTTCTGTGACAGAGTTTCTAAAACCGCGCCT  
GGTTGATATCGAGCAAGTGAGTTCGACGCACGCCAAGGTGACCCTTGAGCCT  
TTAGAGCGTGGCTTTGGCCATACTCTGGGTAACGCACTGCGCCGTATTCTGCT  
CTCATCGATGCCGGGTTGCGCGGTGACCGAGGTTGAGATTGATGGTGTACTA  
CATGAGTACAGCACCAAAGAAGGCGTTCAGGAAGATATCCTGGAAATCCTGC  
TCAACCTGAAAGGGCTGGCGGTGAGAGTTCAGGGCAAAGATGAAGTTATTCT  
TACCTTGAATAAATCTGGCATTGGCCCTGTGACTGCAGCCGATATCACCCACG  
ACGGTGATGTCGAAATCGTCAAGCCGACGACGTGATCTGCCACCTGACCGA  
TGAGAACGCGTCTATTAGCATGCGTATCAAAGTTCAGCGCGGTCGTGGTTAT  
GTGCCGGCTTCTACCCGAATTCATTCGGAAGAAGATGAGCGCCCAATCGGCC  
GTCTGCTGGTCGACGCATGCTACAGCCCTGTGGAGCGTATTGCCTACAATGTT

GAAGCAGCGCGTGTAGAACAGCGTACCGACCTGGACAAGCTGGTCATCGAA  
ATGGAAACCAACGGCACAATCGATCCTGAAGAGGGCGATTTCGTCGTGCGGCAA  
CCATTCTGGCTGAACAACCTGGAAGCTTTCGTTGACTTACGTGATGTACGTCAG  
CCTGAAGTGAAAGAAGAGAAACCAGAGGGCGCCGCAGAATCAAGGCTAGAA  
AGACTGGAACAGCTATTTCTACTGATTTTTCTCGAGAAGACCTTGACATGAT  
TTTGAAAATGGATTCTTTACAGGATATAAAAGCATTGTTAACAGGATTATTTT  
GAAGATCTGCATCGCAGGATGCTGCTGGCTACCCTGTGGAACACCTACATCT  
GTATTAACGAAGCGCTAACCGTTTTTATCAGGCTCTGGGAGGCAGAATAAAT  
GATCATATCGTCAATTATTACCTCCACGGGGAGAGCCTGAGCAAACCTGGCCT  
CAGGCATTTGAGAAGCACACGGTCACACTGCTTCCGGTAGTCAATAAACCGG  
TAAACCAGCAATAGACATAAGCGGCTATTTAACGACCCTGCCCTGAACCGAC  
GACCGGGTCGAATTTGCTTTCGAATTTCTGCCATTCATCCGCTTATTACTT  
ATTCAGGCGTAGCACCAGGCGTTTAAGGGCACCAATAACTGCCTTAAAAAAA  
TTACGCCCCGCCCTGCCACTCATCGCAGTACTGTTGTAATTCATTAAGCATTC  
TGCCGACATGGAAGCCATCACAGACGGCATGATGAACCTGAATCGCCAGCGG  
CATCAGCACCTTGTGCGCTTGCCTATAAATTTGCCCATGGTGAAAACGGGGG  
CGAAGAAGTTGTCCATATTGGCCACGTTTAAATCAAAACTGGTGAAACTCAC  
CCAGGGATTGGCTGAGACGAAAAACATATTCTCAATAAACCTTTAGGGAAA  
TAGGCCAGGTTTTACCGTAACACGCCACATCTTGCGAATATATGTGTAGAA  
ACTGCCGGAAATCGTCGTGGTATTCACTCCAGAGCGATGAAAACGTTTCAGT  
TTGCTCATGGAAAACGGGTGTAACAAGGGTGAACACTATCCCATATCACCAGC  
TCACCGTCTTTCATTGCCATACG

Plasmid features:

|               |                                                                                                                                                     |
|---------------|-----------------------------------------------------------------------------------------------------------------------------------------------------|
| nts 2988- 219 | Chloramphenicol-resistance gene (complementary strand)                                                                                              |
| nts 581-1493  | p15A origin of replication                                                                                                                          |
| nts 1552-1557 | lpp promoter -35 box                                                                                                                                |
| nts 1576-1581 | lpp promoter -10 box                                                                                                                                |
| nts 1624-1629 | lacUV5 promoter -35 box                                                                                                                             |
| nts 1648-1653 | lacUV5 promoter -10 box                                                                                                                             |
| nts 1748-2623 | alpha-Gal4 hybrid protein gene (E. coli RNA polymerase alpha subunit aa 1-248 fused by an Ala-Ala-Ala linker to aa 58-97 of the yeast Gal4 protein) |
