# Supplementary material
Source: PubMed Central journal article supplement (PMC2858690)
Supplement: NIHMS138783-supplement-Supp_Figure_4.pdf [file NIHMS138783-supplement-Supp_Figure_4.pdf]

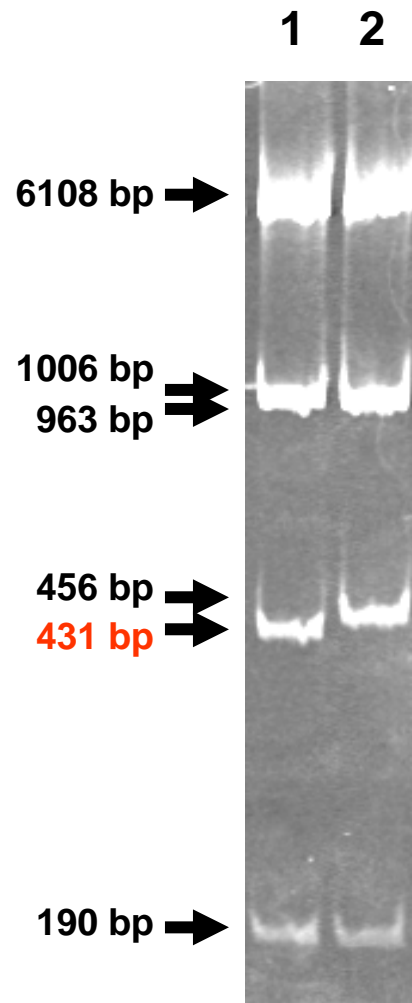

Key:

- 1) pKJ1712 plasmid WITH binding site oligos inserted
- 2) pKJ1712 plasmid WITHOUT binding site oligos inserted
