# Supplementary material
Source: PubMed Central journal article supplement (PMC2858690)
Supplement: NIHMS138783-supplement-Supp_Figure_5_(revised).pdf [file NIHMS138783-supplement-Supp_Figure_5_%28revised%29.pdf]

**CORRECTED** Supplementary Fig. 5 Sequence of *EcoRI-SalI* segment of the binding site reporter

GAATTCTGTgGAAGATCTTCGACAXXXXXXXXXXXXXATTACATTAGGCACCCC  
GGGCTTACACTTTATGCTTCCGGCTCGTATGTTGTGTCGAC
