# Supplementary material
Source: PubMed Central journal article supplement (PMC2858690)
Supplement: NIHMS138783-supplement-Supp_Figure_6.pdf [file NIHMS138783-supplement-Supp_Figure_6.pdf]

**Supplementary Fig. 6 Sequence of *Xba*I-*Bam*HI fragment encoding a generic three-finger array**

TCTAGACCCGGGGAGCGCCCCTTCCAGTGTCGCATTTGCATGCGGAACTTTTC  
GXXXXXXXXXXXXCTTXXXXXXCATACCCGTA CTCATACCGGTGAAAAACC  
GTTTCAGTGTCGGATCTGTATGCGAAATTTCTCCXXXXXXXXXXXXTTGXXX  
XXXCATCTACGTACGCACACCGGCGAGAAGCCATTCCAATGCCGAATATGCA  
TGCGCAACTTCAGTXXXXXXXXXXXXCTGXXXXXXCACCTAAAAACCCACC  
TGAGGGGATCC
